# Supplementary material for: Exploring the link between MORF4L1 and risk of breast cancer
Source: Breast Cancer Res. 2011 Apr 5;13(2):R40. doi: 10.1186/bcr2862 (PMC3219203; doi:10.1186/bcr2862)
Supplement: Additional file 1 — Y2H baits for 12 proteins in the FA/BrCa signaling pathway. Supplementary Table 1 containing details of the design of Y2H baits for 12 proteins in the FA/BrCa signaling pathway. [file bcr2862-S1.xls]

## Sheet: Y2H baits
Table S1: Defined Y2H baits for 12 proteins in the FA/BrCa signaling pathway
Protein	GenBank accession number	Consensus coding sequence (aa)	Bait (full-length open reading frame, Pfam- or PONDR-based)*	5´aa	3´aa	Forward primer (with Gateway tails for pDONR201 cloning)	Reverse primer (with Gateway tails for pDONR201 cloning)
ATR	NP_001175	2644	Middle region	1370	1695	5'-GGGGACAAGTTTGTACAAAAAAGCAGGCTTGGATTTCTCAACAACTGAA-3'	5'-GGGGACCACTTTGTACAAGAAAGCTGGGTCTAAATTGCACTGACTCCGGC-3'
			TPR-MAD3-BUB1	1707	1986	5'-GGGGACAAGTTTGTACAAAAAAGCAGGCTTGCTTGAACATGAAAGCCTT-3'	5'-GGGGACCACTTTGTACAAGAAAGCTGGGTCTATTCAGGAAAACATAATTC-3'
			PI3-PI4 kinase	2321	2567	5'-GGGGACAAGTTTGTACAAAAAAGCAGGCTTGTTCTACATCATGATGTGT-3'	5'-GGGGACCACTTTGTACAAGAAAGCTGGGTCTATTTACTCCATTCCACAAG-3'
			PI3-PI4 kinase-FATC	2321	2644	5'-GGGGACAAGTTTGTACAAAAAAGCAGGCTTGTTCTACATCATGATGTGT-3'	5'-GGGGACCACTTTGTACAAGAAAGCTGGGTCTACATATATGGAGTCCAACC-3'
BLM	NP_000048	1417	N-term/BDHCT	1	411	5'-GGGGACAAGTTTGTACAAAAAAGCAGGCTTGGCTGCTGTTCCTCAAA-3'	5'-GGGGACCACTTTGTACAAGAAAGCTGGGTCTATAGAAGTTTCCTTCTTAT-3'
			DEAD-helicase	412	984	5'-GGGGACAAGTTTGTACAAAAAAGCAGGCTTGACGGAAGTAGATTTTAATA-3'	5'-GGGGACCACTTTGTACAAGAAAGCTGGGTCTACCCATCTCTTCCAGCTCT-3'
			C-term disordered	1289	1417	5'-GGGGACAAGTTTGTACAAAAAAGCAGGCTGGACATCGCCAGCTGAAGACAGT-3'	5'-GGGGACCACTTTGTACAAGAAAGCTGGGTCTATGAGAATGCATATGAAGG-3'
BRIP1	NP_114432	1249	Helicase	698	849	5'-GGGGACAAGTTTGTACAAAAAAGCAGGCTCTTACAAGTTATTAGAAAAA-3'	5'-GGGGACCACTTTGTACAAGAAAGCTGGGTCTAAAAGCGATCATCCACTAG-3'
CHEK2	NP_001005735	586	Full-length	1	586	5'-GGGGACAAGTTTGTACAAAAAAGCAGGCTTGTCTCGGGAGTCGGATG-3'	5'-GGGGACCACTTTGTACAAGAAAGCTGGGTCTATCACAACACAGCAGCACA-3'
			FHA	156	235	5'-GGGGACAAGTTTGTACAAAAAAGCAGGCTTGTACTGGTTTGGGAGGGAC-3'	5'-GGGGACCACTTTGTACAAGAAAGCTGGGTCTATGACAGTGCAATTTCAGA-3'
			Disordered	501	586	5'-GGGGACAAGTTTGTACAAAAAAGCAGGCTTGAAAGCTCTGGACCTTGTC-3'	5'-GGGGACCACTTTGTACAAGAAAGCTGGGTCTATCACAACACAGCAGCACA-3'
ERCC1	NP_001974	297	Full-length	1	297	5'-GGGGACAAGTTTGTACAAAAAAGCAGGCTTGGACCCTGGGAAGGACAA-3'	5'-GGGGACCACTTTGTACAAGAAAGCTGGGTCTAGGGTACTTTCAAGAAGGG-3'
			Disordered	1	105	5'-GGGGACAAGTTTGTACAAAAAAGCAGGCTTGGACCCTGGGAAGGACAA-3'	5'-GGGGACCACTTTGTACAAGAAAGCTGGGTCTAAGGGCTCACAATGATGCT-3'
			RAD10	99	166	5'-GGGGACAAGTTTGTACAAAAAAGCAGGCTCCAACAGCATCATTGTGAGC-3'	5'-GGGGACCACTTTGTACAAGAAAGCTGGGTCTACAAGGCGAAGTTCTTCCC-3'
			HHH	259	297	5'-GGGGACAAGTTTGTACAAAAAAGCAGGCTTATCTCTGGAACAGCTCATC-3'	5'-GGGGACCACTTTGTACAAGAAAGCTGGGTCTAGGGTACTTTCAAGAAGGG-3'
ERCC4	NP_005227	916	RIH-DUF809-1919	232	400	5'-GGGGACAAGTTTGTACAAAAAAGCAGGCTCAATTTTAAATGCATGTCTA-3'	5'-GGGGACCACTTTGTACAAGAAAGCTGGGTCTAAGCTTCACTCTCCTTATT-3'
			ERCC	683	916	5'-GGGGACAAGTTTGTACAAAAAAGCAGGCTCAAGCATAGTTGTGGATATG-3'	5'-GGGGACCACTTTGTACAAGAAAGCTGGGTCTACTTTTTCCCTTTTCCTTTTGA-3'
			Disordered	442	541	5'-GGGGACAAGTTTGTACAAAAAAGCAGGCTCAAAGGATAGCAAAGCTGAA-3'	5'-GGGGACCACTTTGTACAAGAAAGCTGGGTCTAATCCGATGACAAATTTAC-3'
H2AFX	NP_002096	143	Full-length	1	143	5'-GGGGACAAGTTTGTACAAAAAAGCAGGCTTGTCGGGCCGCGGCAAGAC-3'	5'-GGGGACCACTTTGTACAAGAAAGCTGGGTCTAGTACTCCTGGGAGGCCTG-3'
PALB2	NP_078951	1186	Disordered	428	575	5'-GGGGACAAGTTTGTACAAAAAAGCAGGCTTGGTCATTCAGAGTCATTTG-3'	5'-GGGGACCACTTTGTACAAGAAAGCTGGGTCTACCAAGAAAGGGAATCCTC-3'
			Disordered	610	863	5'-GGGGACAAGTTTGTACAAAAAAGCAGGCTTGACAGACTTTCAGTTACCT-3'	5'-GGGGACCACTTTGTACAAGAAAGCTGGGTCTAATTCTTTAACTCTGAAAC-3'
			Disordered	945	1025	5'-GGGGACAAGTTTGTACAAAAAAGCAGGCTTGAGGGCATTGTTTTGTTCC-3'	5'-GGGGACCACTTTGTACAAGAAAGCTGGGTCTAAGCTTCTTGCATCCCTTG-3'
			WD40	1025	1186	5'-GGGGACAAGTTTGTACAAAAAAGCAGGCTTGGCTCTGCTTGGTACTACTATTA-3'	5'-GGGGACCACTTTGTACAAGAAAGCTGGGTCTATGAATAGTGGTATACAAA-3'
RAD51	NP_002866	339	HHH	1	77	5'-GGGGACAAGTTTGTACAAAAAAGCAGGCTTGGCAATGCAGATGCAGC-3'	5'-GGGGACCACTTTGTACAAGAAAGCTGGGTCTACTCAGCCAGAATTTTATC-3'
TOP3A	NP_004609	1001	Topisomerase-zf-GRF	595	811	5'-GGGGACAAGTTTGTACAAAAAAGCAGGCTTGATCTGTGATGGCAAAAAG-3'	5'-GGGGACCACTTTGTACAAGAAAGCTGGGTCTACACAGAATTGCTTTCACC-3'
			GRF-disordered	745	1001	5'-GGGGACAAGTTTGTACAAAAAAGCAGGCTTGAGGGAGATCCTGGACCTGAGAT-3'	5'-GGGGACCACTTTGTACAAGAAAGCTGGGTCTATCTGTTCTGAGGACAAAA-3'
TOPBP1	NP_008958	1435	N-term/BRCTs	1	184	5'-GGGGACAAGTTTGTACAAAAAAGCAGGCTTGCACCACCAGCGATGTG-3'	5'-GGGGACCACTTTGTACAAGAAAGCTGGGTCTAAATACTGTCAAAAAACCA-3'
			Disordered	196	264	5'-GGGGACAAGTTTGTACAAAAAAGCAGGCTACAAGACAGAACCTAGACCA-3'	5'-GGGGACCACTTTGTACAAGAAAGCTGGGTCTATGCACTGACATCCAGATT-3'
			Disordered	362	497	5'-GGGGACAAGTTTGTACAAAAAAGCAGGCTTGCCAGTGGAAATTCCAGTT-3'	5'-GGGGACCACTTTGTACAAGAAAGCTGGGTCTAGGACATGATTTTCCCAGC-3'
			Disordered	643	836	5'-GGGGACAAGTTTGTACAAAAAAGCAGGCTTGAGAGCAGACGAAAGCCAT-3'	5'-GGGGACCACTTTGTACAAGAAAGCTGGGTCTATAGTTCACTCTGCTTCTT-3'
			Disordered	931	1173	5'-GGGGACAAGTTTGTACAAAAAAGCAGGCTTGGTGTCTTCAACAAAGGAT-3'	5'-GGGGACCACTTTGTACAAGAAAGCTGGGTCTAAGTCTCCTCTATCGTTAT-3'
USP1	NP_001017415	785	Disordered	1	77	5'-GGGGACAAGTTTGTACAAAAAAGCAGGCTTGCCTGGTGTCATACCTA-3'	5'-GGGGACCACTTTGTACAAGAAAGCTGGGTCTACAAGTTTTCTCTCTTCTC-3'
			Disordered	224	488	5'-GGGGACAAGTTTGTACAAAAAAGCAGGCTTGAAAAATGTGGCAGAATTA-3'	5'-GGGGACCACTTTGTACAAGAAAGCTGGGTCTATGCCCATCTCAGGGTCTT-3'
Y2H, yeast two-hybrid; aa, amino acid(s). *Some protein domains or regions are not represented as they were not successfully cloned and suggestive Pfam and PONDR predictions are included.
