# Supplementary material for: Exploring the link between MORF4L1 and risk of breast cancer
Source: Breast Cancer Res. 2011 Apr 5;13(2):R40. doi: 10.1186/bcr2862 (PMC3219203; doi:10.1186/bcr2862)
Supplement: Additional file 2 — siRNAs used in the present study. Supplementary Table 2 containing details of the siRNAs used in the present study. [file bcr2862-S2.xls]

## Sheet: siRNAs
Table S2: siRNAs used in this study
Gene	siRNA (5'-3'; Sigma-Aldrich)
CHUK1
siRNA#1	GGCUGCUCACAAGUUCUAU
KPNA1
siRNA#1	CUAAUCUCUGUAGAGGGAA
siRNA#2	GGAAGAAGGACUGCAGUUA
siRNA#3	CAGUACAUCUUCCAACAGU
MORF4L1
Stealth RNAi #HSS145886 and #HSS145887 (Invitrogen)
MORF4L2
Stealth RNAi #HSS114413 and #HSS114414 (Invitrogen)
PPHLN1
siRNA#1	UUUCCAUCAGUCUCAACAUAG
TSNAX
siRNA#1	GAGACUUGUGAAACUUAGUC
Control Stealth siRNA Lo GC (12935-200, Invitrogen)
siRNA, small interfering RNA
