# Supplementary material for: Exploring the link between MORF4L1 and risk of breast cancer
Source: Breast Cancer Res. 2011 Apr 5;13(2):R40. doi: 10.1186/bcr2862 (PMC3219203; doi:10.1186/bcr2862)
Supplement: Additional file 3 — Primers for sequencing of MORF4L1. Supplementary Table 3 containing details of primers used for sequencing of MORF4L1. [file bcr2862-S3.xls]

## Sheet: Primers
Table S3: MORF4L1 sequencing primers and fragments
Designation	Sequence (5'-3')	Tm	Fragment (bp)
Exon 1-alternative forward	AGTTGGTTGTCTGCTGCCTA	58
Exon 1-alternative reverse	GCCAGAGAAGACTGGAGAGG	62	239
Exon 1 forward	TGCGCGGGTCGCGGTGCTGTGA	64
Exon 1 reverse	CCGCCTCTATCTCCTGCGCCGTTA	63	261
Exon 2 forward	TTGAGCCAAAGTGGTGCTCTG	54
Exon 2 reverse	GCAACTCTCTTACTGAGGCAACAAC	58	301
Exon 3 forward	AGGCCACCATAAAGCTTGTGTA	53
Exon 3 reverse	TTCACCTTTGCTTCAATATGTACT	51	302
Exon 4 forward	TCATTGGAATTTGTTGACACACACT	53
Exon 4 reverse	GATTTCCCACCTCTGACCTCTT	55	339
Exon 5 forward	AGAGAAATCCAGTCTTGCCTCTTG	56
Exon 5 reverse	AGCAGCTGAAAGGTACCAGGAA	55	304
Exon 6 forward	AAAACTTGTTGCCAGAATTTGAA	48
Exon 6 reverse	TGAGGAATGGGATTCTTACTGGTT	54	320
Exon 7 forward	GCGCCTGGCTTGGTTTATTT	52
Exon 7 reverse	AATGCTCACAAGTTTCTCCTTGG	53	436
Exon 8 forward	TGGAGAAATAATGAAAAGGGTT	47
Exon 8 reverse	TTTCAGGTATTAACCATGTAAGCAAA	52	304
Exon 9 forward	TTTTCTCCCAACAGCGAACC	52
Exon 9 reverse	CTGGTAGTAGTTCTAAAGTGTTCAGCC	58	443
Exon 10 forward	TTTGAAATACTGTTACTGTTACCTG	51
Exon 10 reverse	GTTTCTGGTGGTATTAATGTTTCG	52	303
Exon 11 forward	AAAATCTCAGCTATGGTTCATT	47
Exon 11 reverse	TGGGAGTCATGTTTTGGAAAG	50	393
Exon 12 forward	GCCCGGCCTAAAATCATGTA	52
Exon 12 reverse	GCTCCATTACCAACTATCTATGCCT	56	331
Exon 13 forward	TCAAAGCACATCGTTTGTACAAGAGATAGA	58
Exon 13 reverse	GTTTTACTGTGAGAGAATGTCTGGTTTAATGTA	58	308
Tm, melting temperature; bp, base pairs.
