# Supplementary material for: Exploring the link between MORF4L1 and risk of breast cancer
Source: Breast Cancer Res. 2011 Apr 5;13(2):R40. doi: 10.1186/bcr2862 (PMC3219203; doi:10.1186/bcr2862)
Supplement: Additional file 4 — FA/BrCa signaling pathway components. Supplementary Table 4 containing details of known and potential FA/BrCa signaling pathway components identified through Y2H screens. [file bcr2862-S4.xls]

## Sheet: Y2H results
Table S4: Protein physical interactions identified through Y2H screens
Protein	GenBank accession number	Bait (Pfam- or PONDR-based)*	5´aa	3´aa	Prey	Multiple Y2H screening hits (yeast colonies)*	Different overlapping cDNAs*	Literature support
ATR	NP_001175	Middle region	1370	1695	CHUK	y	n	Fanconi anemia protein complex is a novel target of the IKK signalsome
BLM	NP_000048.1	C-term disordered region	1289	1417	MLH1	y	n	Direct association of Bloom's syndrome gene product with the human mismatch repair protein MLH1
CHEK2	NP_001005735	FHA	156	235	NFKB1	y	n	BRCA1 augments transcription by the NF-kappaB transcription factor by binding to the Rel domain of the p65/RelA subunit
								NF-kappaB p105 is a target of IkappaB kinases and controls signal induction of Bcl-3-p50 complexes
ERCC4	NP_005227	ERCC domain	683	916	ERCC1	y	n	Formation of a ternary complex by human XPA, ERCC1, and ERCC4(XPF) excision repair proteins
PALB2	NP_078951	Disordered region	610	863	MRG15	y	y	Mrg15 null and heterozygous mouse embryonic fibrob...[FEBS Lett. 2007] - PubMed Result
TOP3A	NP_004609	Topisomerase - zinc finger - GRF domains	595	811	TSNAX	y	n	DNA damage-dependent interaction of the nuclear ma...[J Cell Sci. 2002] - PubMed Result
								Human MMS21/NSE2 is a SUMO ligase required for DNA...[Mol Cell Biol. 2005] - PubMed Result
TOPBP1	NP_008958	Disordered region	931	1173	PPHLN1	y	y	Overexpression of CR/periphilin downregulates Cdc7...[Biochem Biophys Res Commun. 2004] - PubMed Result
USP1	NP_001017415	Disordered region	224	488	KPNA1	n	n	RAG-1 interacts with the repeated amino acid motif...[Proc Natl Acad Sci U S A. 1994] - PubMed Result
*Yes/no (y/n). Y2H, yeast two-hybrid; aa, amino acid; cDNA, complementary DNA.
