# Supplementary material for: Exploring the link between MORF4L1 and risk of breast cancer
Source: Breast Cancer Res. 2011 Apr 5;13(2):R40. doi: 10.1186/bcr2862 (PMC3219203; doi:10.1186/bcr2862)
Supplement: Additional file 13 — BrCa risk estimates for rs7164529 and rs10519219. Supplementary Table 5 containing BrCa risk estimates (HR and wHR) for rs7164529 (additive model) and rs10519219 (recessive model) among BRCA2 mutation carriers across participating centers. [file bcr2862-S13.xls]

## Sheet: rs7164529-rs10519219
Table S5: Estimates (HR and weighted HR (wHR)) of modification of BrCa risk by rs7164529 and rs10519219 among BRCA2 mutation carriers
		rs7164529 additive model
Center (Country)	BRCA2 mutation carriers (n)	HR	95% CI		wHR	95% CI
			Lower	Upper		Lower	Upper
EMBRACE (UK)	812	1.1	0.95	1.27	1.07	0.86	1.33
GEMO (France, USA)	561	1.03	0.9	1.17	1.07	0.85	1.34
CONSIT TEAM (Italy)	468	0.99	0.85	1.17	0.86	0.65	1.14
kConFab (Australia)	461	1.13	0.96	1.33	1.21	0.92	1.58
HEBON (The Netherlands)	280	1.1	0.82	1.47	1.08	0.73	1.6
BCFR (USA)	236	1.05	0.82	1.34	1.06	0.73	1.55
SWE-BRCA (Sweden)	171	1.28	0.97	1.68	1.42	0.94	2.15
SMC (Israel)	170	0.98	0.72	1.33	1.04	0.67	1.63
UPENN (USA)	151	0.96	0.72	1.28	1	0.57	1.75
ILUH (Iceland)	129	0.78	0.62	0.99	0.63	0.45	0.88
MAYO (USA)	127	1.14	0.8	1.62	1.6	0.94	2.72
HCSC (Spain)	117	1.17	0.84	1.62	1.03	0.65	1.65
HEBCS (Finland)	100	1.22	0.79	1.91	1.2	0.59	2.45
DKFZ (Germany, Colombia, Pakistan)	69	1.69	1.09	2.63	2.5	1.25	4.99
PBCS (Italy)	56	1.43	0.91	2.26	2.38	1.33	4.25
FCCC (USA)	45	1.05	0.51	2.16	1.16	0.29	2.57
GEORGETOWN (USA)	15	0.17	0.03	0.93	0.07	0.01	1.05
		rs10519219 recessive model
Center (Country)	BRCA2 mutation carriers (n)	HR	95% CI		wHR	95% CI
			Lower	Upper		Lower	Upper
EMBRACE (UK)	811	1.16	0.57	2.35	1.44	0.51	4.04
CONSIT TEAM (Italy)	462	1.9	0.97	3.72	2.52	1.01	6.31
kConFab (Australia)	454	2.87	1.69	4.86	4.7	1.31	16.83
GEMO (France, USA)	450	1.46	0.47	4.54	1.42	0.24	8.43
HEBON (The Netherlands)	300	0.31	0.03	2.9	0.16	0.01	1.82
BCFR (USA)	237	1.78	0.79	3.98	5.02	1.11	22.76
SWE-BRCA (Sweden)	172	1.31	0.45	3.84	1.22	0.24	6.16
UPENN (USA)	150	2.2	1.03	4.67	10.05	3.95	25.59
ILUH (Iceland)	131	5.82	1.82	18.61	5.82	1.82	18.61
MAYO (USA)	124	1.02	0.09	11.87	5.6	0.59	52.96
HCSC (Spain)	107	1.23	0.34	4.42	1.22	0.14	10.39
HEBCS (Finland)	101	1.06	0.53	2.1	1.9	0.45	8
DKFZ (Germany, Colombia, Pakistan)	69	NA			NA
PBCS (Italy)	57	NA			NA
FCCC (USA)	45	NA			NA
GEORGETOWN (USA)	34	NA			NA
HR, hazard ratio; wHR, weighted hazard ratio; CI, confidence interval; n, number of individuals.
